# Supplementary material for: Coccolithophore biodiversity controls carbonate export in the Southern Ocean
Source: Copernicus journal article supplement (doi:10.5194/bg-2019-352), 2019-09-09
Supplement: Supplementary file 1 [file bg-2019-352-supplement.pdf]

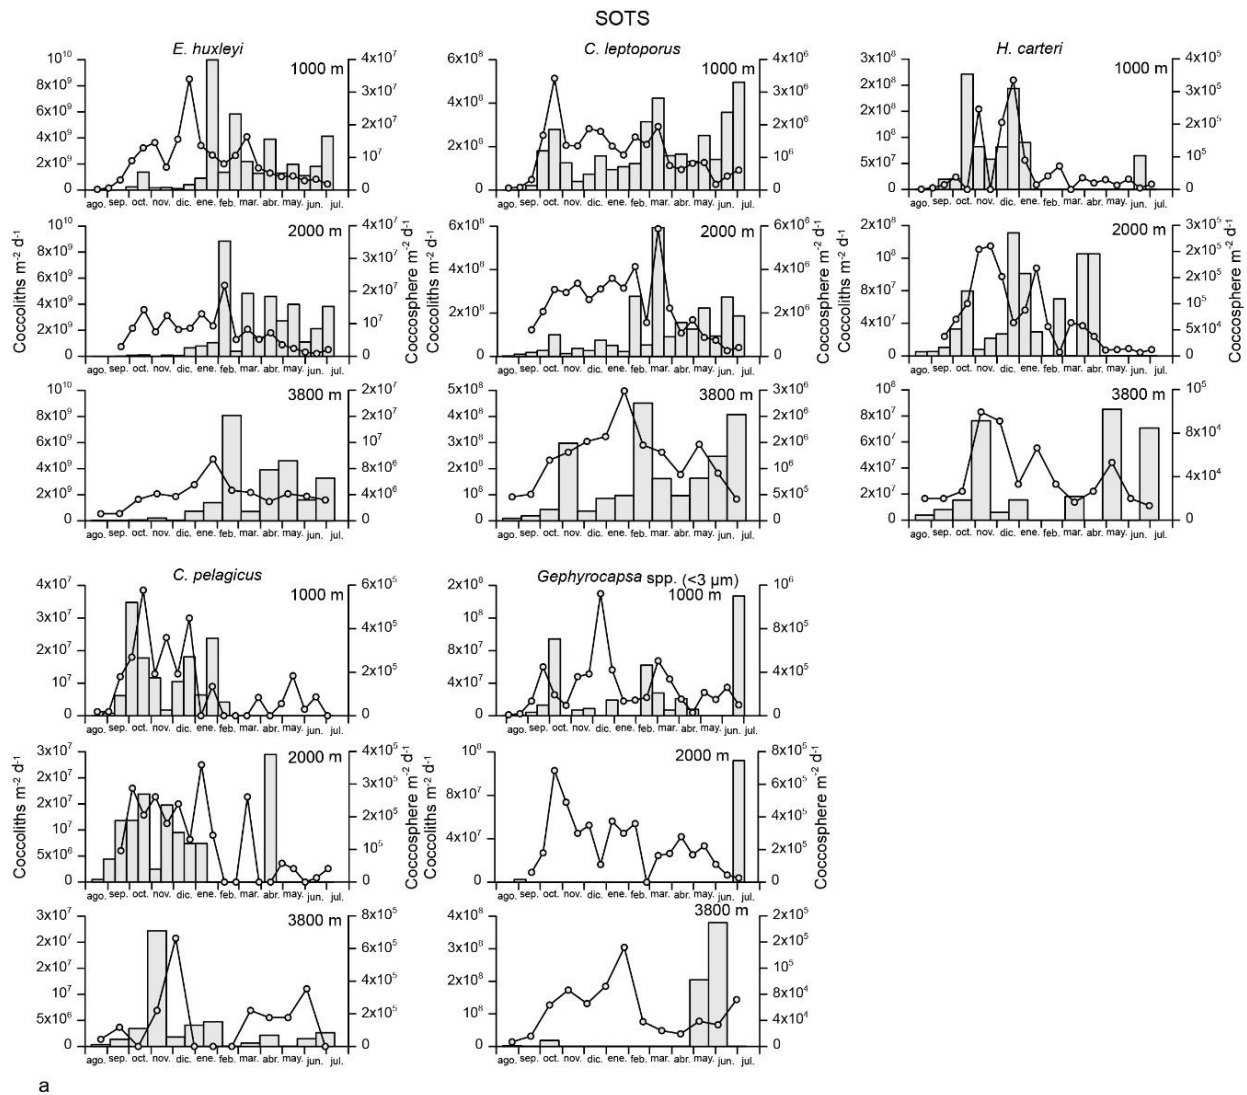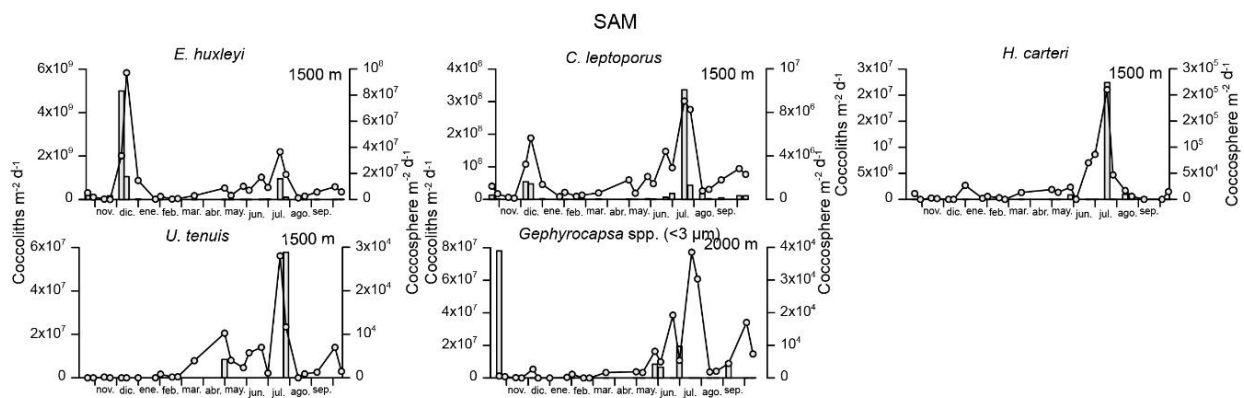

**Supplement Figure 1.** Seasonal variation of coccolith and coccosphere fluxes of the main coccolithophore species collected by the SOTS sediment traps (at 1000, 2000 and 3800 m depth) between August 2011 to July 2012 and the SAM sediment trap (1500 m) between November 2009 to November 2010.

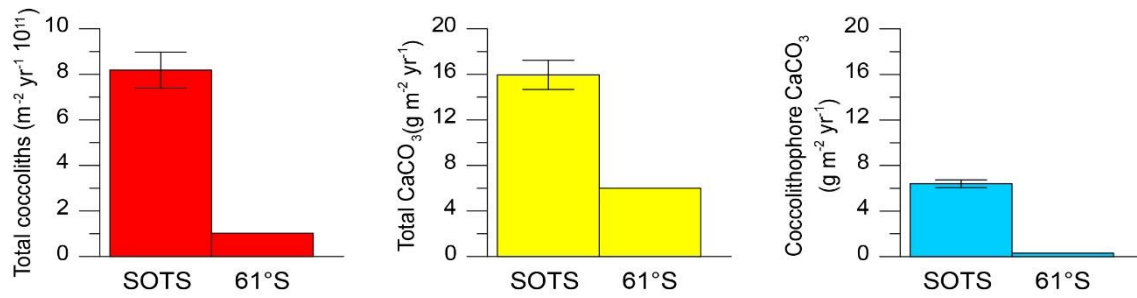

**Supplement Figure 2.** Annual coccolith, total  $\text{CaCO}_3$  and coccolithophore  $\text{CaCO}_3$  fluxes for the < 1mm particulate fraction for the SOTS (average for three depths and standard deviation) and 61°S sites (Rigual Hernández et al., 2018).

### References

Rigual Hernández, A.S., Flores, J.A., Sierro, F.J., Fuertes, M.A., Cros, L., Trull, T.W., 2018. Coccolithophore populations and their contribution to carbonate export during an annual cycle in the Australian sector of the Antarctic Zone. *Biogeosciences* 2017, 1-40.
